# Supplementary material for: Deep Learning on field photography reveals the morphometric diversity of Colombian Freshwater Fish
Source: Research Square preprint supplement (doi:10.21203/rs.3.rs-6552537/v1), 2025-05-07
Supplement: Supplementary file 1 [file a2fde4efee6ff1e31d8fceea.docx]

**Supporting Information**

**
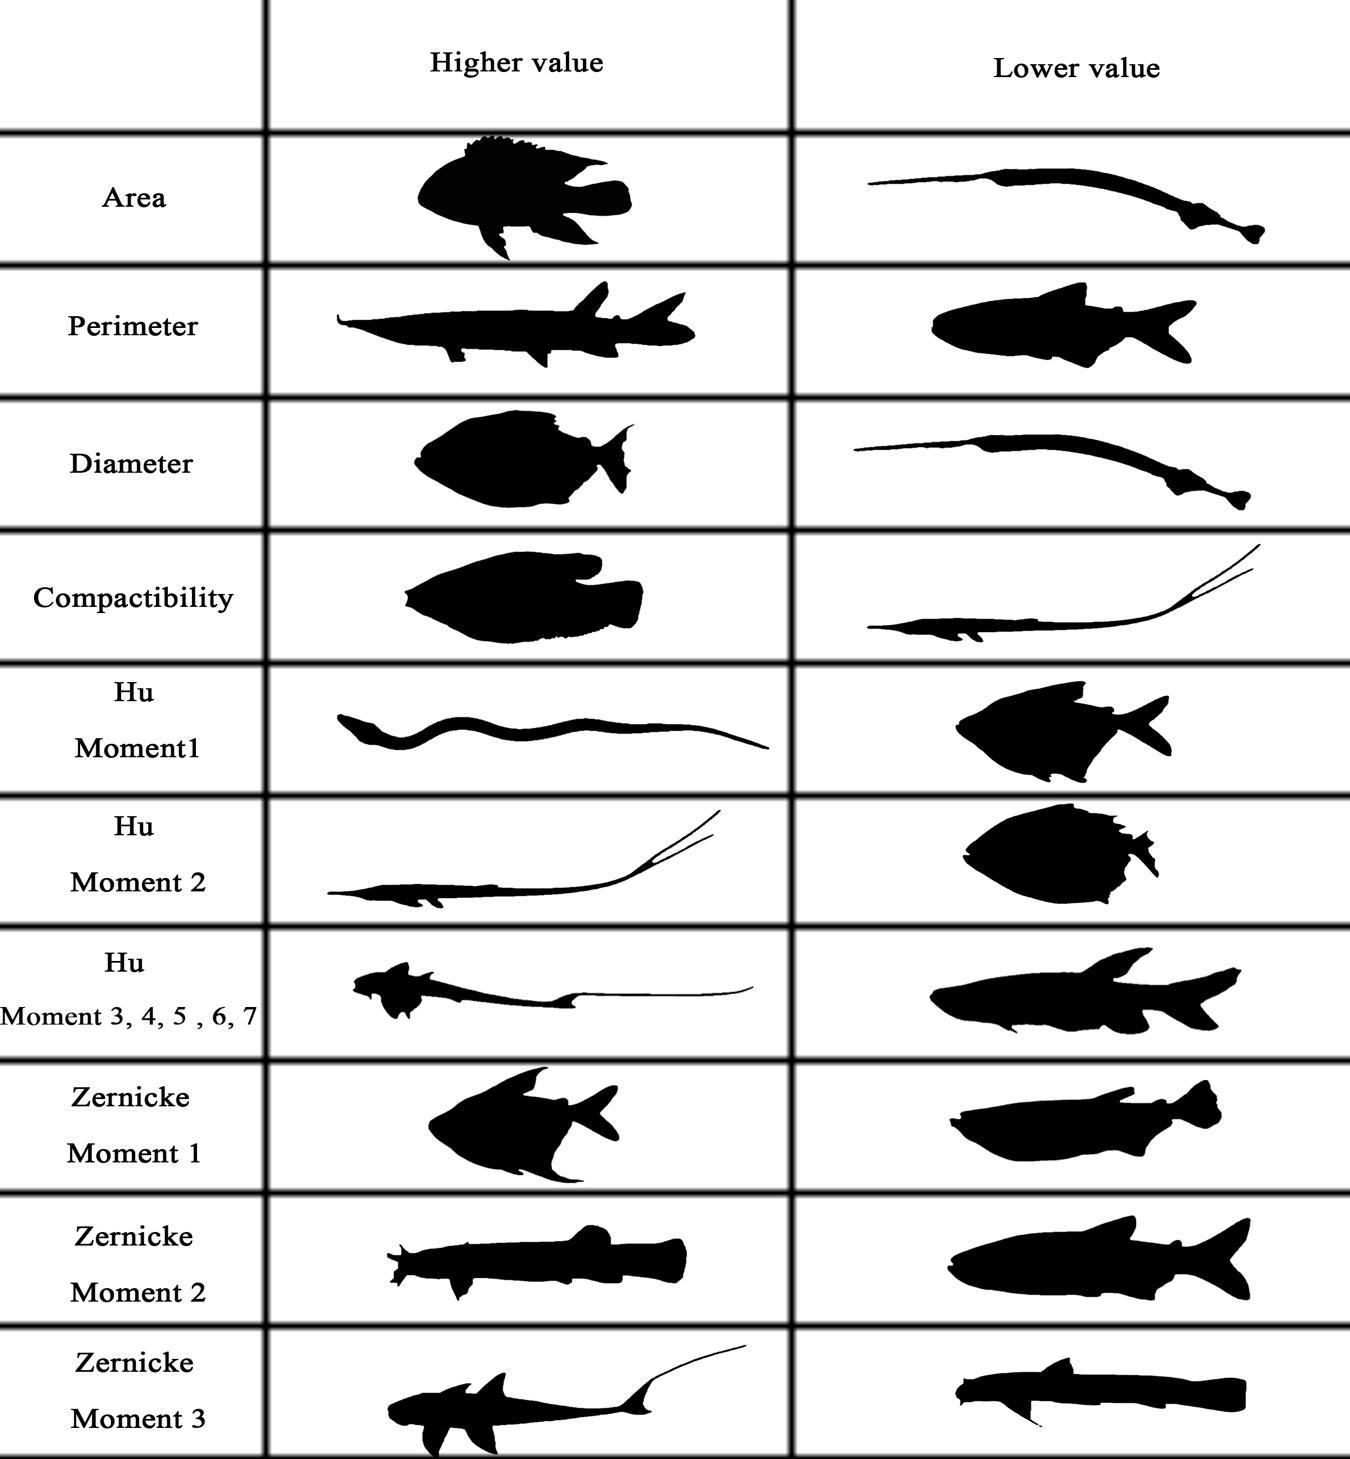
**

**Fig. S1** Correlation Matrix of Morphological Descriptors

**
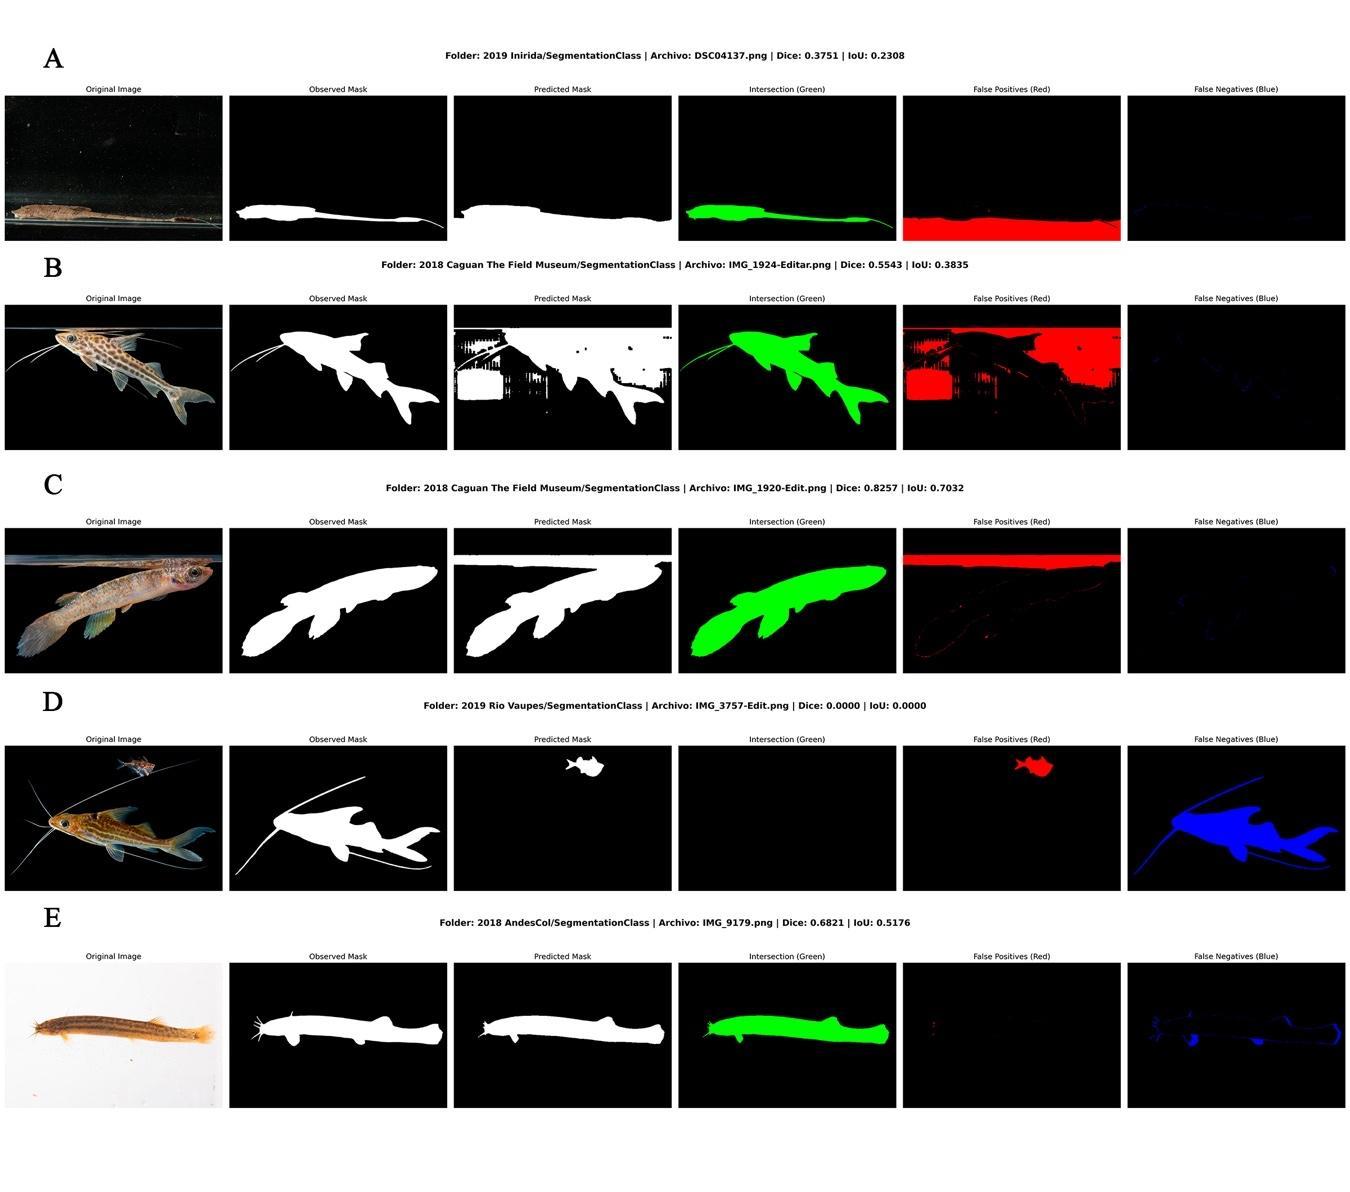
Fig. S2** The five most error-prone fish segmentation cases, identified by the lowest Dice and IoU. Each row (A–E) shows the original image, ground-truth mask, predicted mask, and an error map (green = intersection, red = false positives, blue = false negatives).**
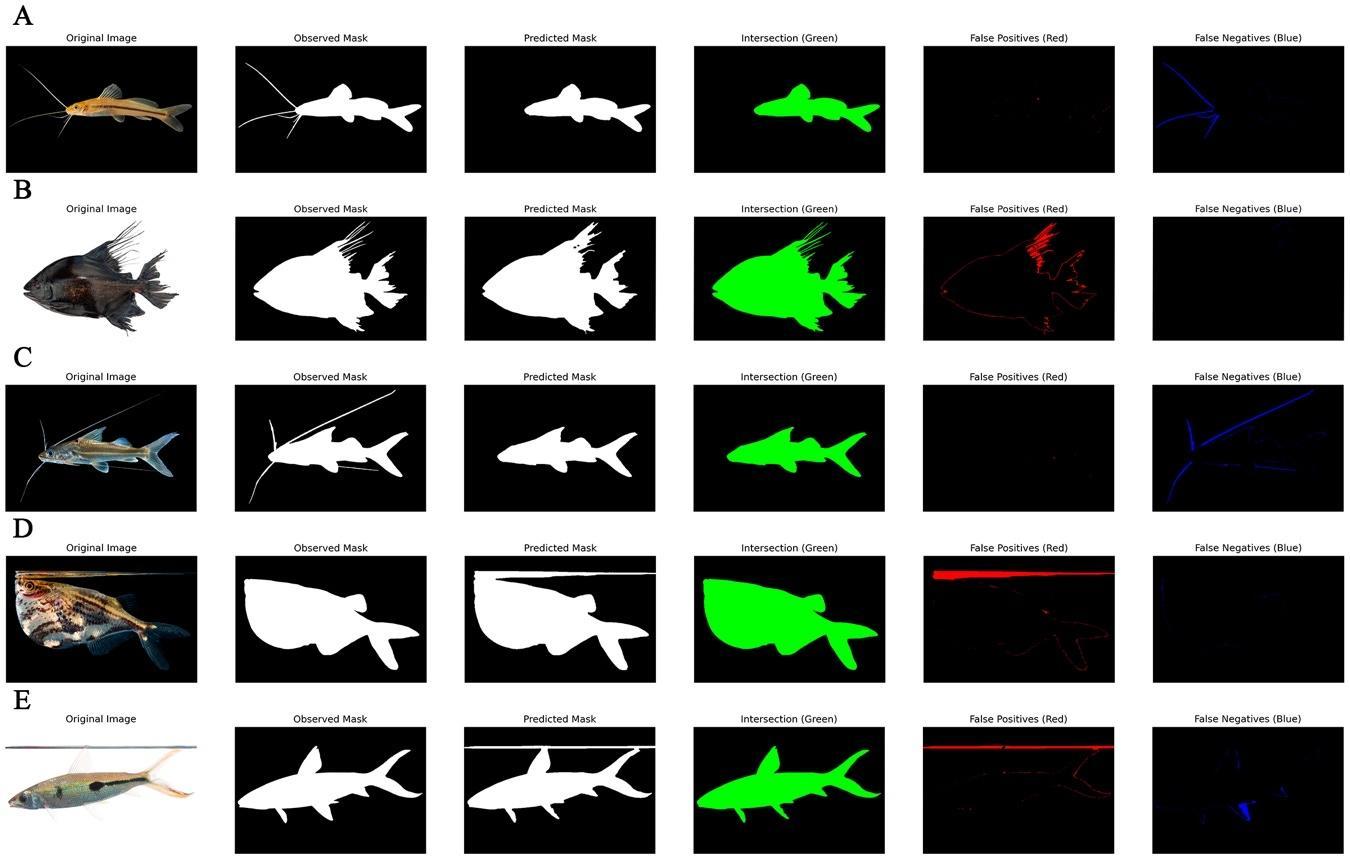
**

**Fig. S3** The five largest perimeter segmentation errors, identified by R² and RMSE in observed vs. predicted perimeter analysis. Each row (A–E) shows the original image, ground truth mask, predicted mask, and error map (green = intersection, red = false positives, blue = false negatives).

**
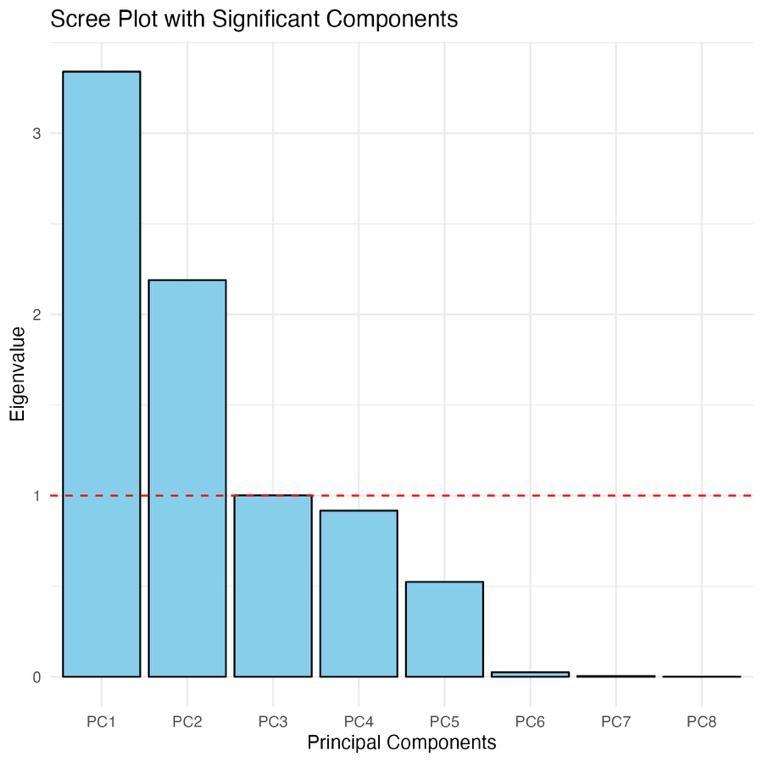
**

**Fig. S4** Scree plot showing significant Principal Components based on Eigenvalues of morphological characterization of Colombian freshwater fish


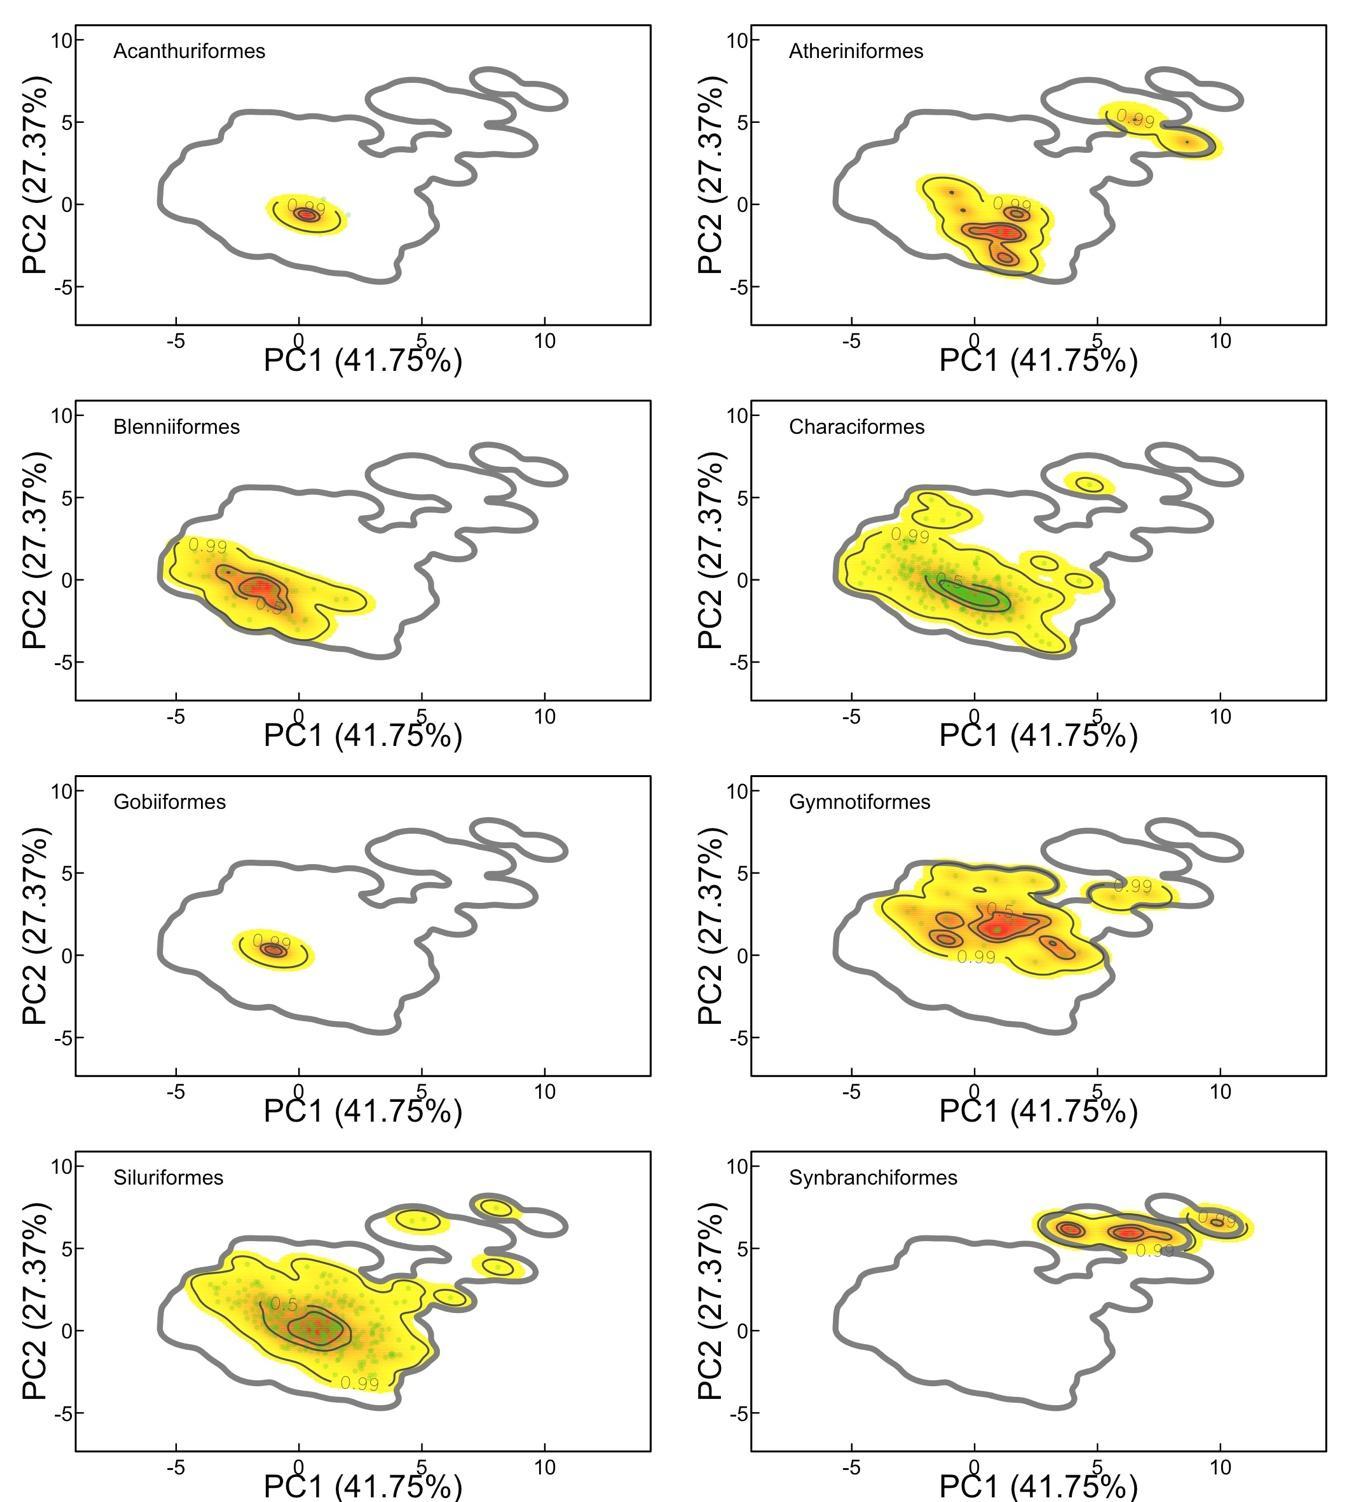


**Fig. S5** Morphological space distribution across taxonomic Orders of Colombian Freshwater Fish based on Principal Components

**Table S1** Principal component analysis (PCAs) of global spectrum of morphological characterization of Colombian freshwater fish

| **Importance of components** | **Comp.1** | **Comp.2** | **Comp.3** | **Comp.4** | **Comp.5** | **Comp.6** | **Comp.7** | **Comp.8** |
| --- | --- | --- | --- | --- | --- | --- | --- | --- |
| Standard deviation | 1,827 | 1,480 | 1,001 | 0,957 | 0,724 | 0,158 | 0,065 | 0,003 |
| Proportion of Variance | 0,417 | 0,274 | 0,125 | 0,115 | 0,065 | 0,003 | 0,001 | 0,000 |
| Cumulative Proportion | 0,417 | 0,691 | 0,816 | 0,931 | 0,996 | 0,999 | 1,000 | 1,000 |
| **Loadings** |  |  |  |  |  |  |  |  |
| Hu.Moment.1 | 0,412 | 0,405 |  | 0,133 | 0,294 | 0,735 | 0,148 |  |
| Hu.Moment.2 | 0,379 | 0,405 |  | 0,153 | 0,496 | -0,629 | -0,163 |  |
| Zernike.Moment.1 |  |  | 0,993 | -0,116 |  |  |  |  |
| Zernike.Moment.3 |  | 0,237 | -0,113 | -0,962 |  |  |  |  |
| Area | -0,488 | 0,295 |  |  | 0,146 | 0,119 | -0,371 | 0,707 |
| Perimeter | -0,336 | 0,521 |  |  | -0,192 | -0,186 | 0,732 |  |
| Diameter | -0,488 | 0,295 |  |  | 0,147 | 0,118 | -0,370 | -0,708 |
| Compatibility | -0,305 | -0,413 |  |  | 0,765 |  | 0,370 |  |

Principal components (PCs) display variance (via standard deviations), and their proportion and cumulative proportion indicate explained variance. Trait loadings show each morphological variable’s impact on the PCs; higher absolute values imply stronger influence. Blank cells represent minimal contributions.
